# Supplementary material for: Degradation of Carbamazepine from Aqueous Solutions via TiO2-Assisted Photo Catalyze
Source: MDPI journal article supplement (doi:10.3390/toxics10040168), 2022-03-31
Supplement: s1 [file s1]

# Supplementary Materials: Degradation of Carbamazepine from Aqueous Solutions via TiO<sub>2</sub>-Assisted Photo Catalyze

Mirela Alina Constantin, Florentina Laura Chiriac, Stefania Gheorghe and Lucian Alexandru Constantin

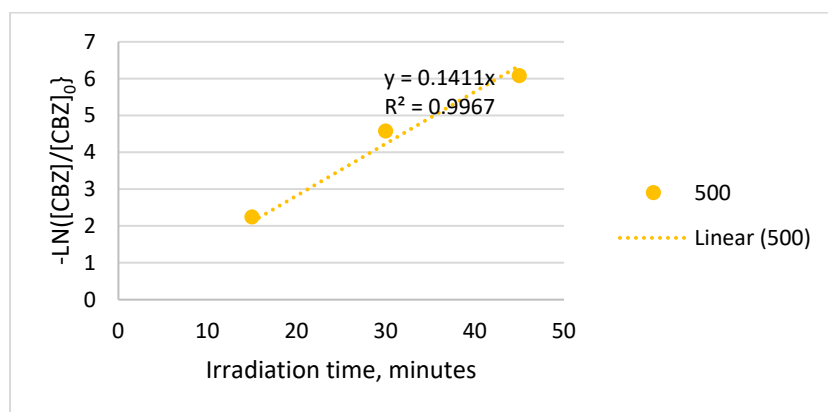

**Figure S1.** Linearization of CBZ degradation in UV/TiO<sub>2</sub> system by pseudo-first order kinetic, [TiO<sub>2</sub>] = 500 mg/L, [CBZ]<sub>0</sub> = 8.75 mg/L =  $3.71 \times 10^{-5}$  M, irradiation time = 45 min.

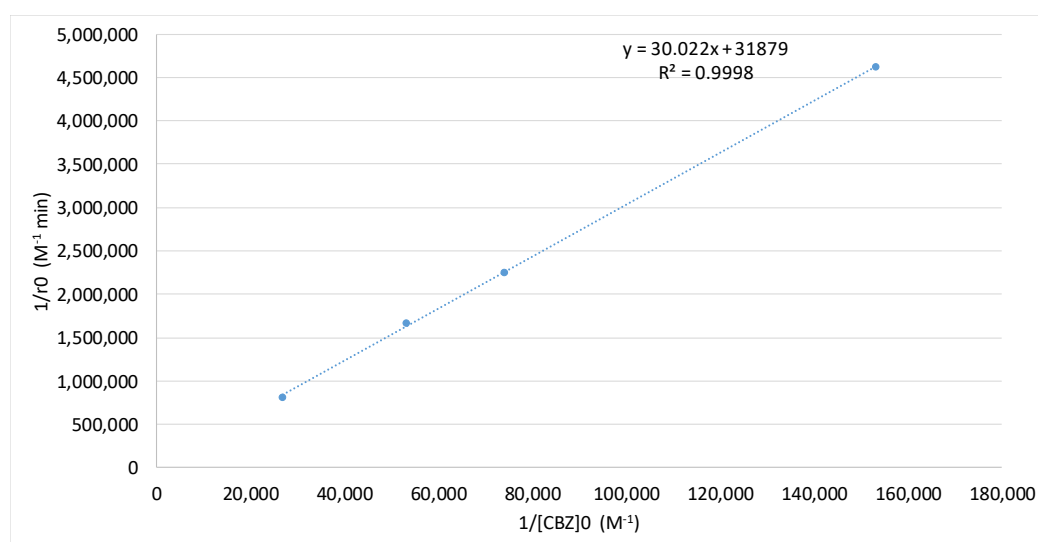

**Figure S2.** Linearization of Langmuir-Hinshelwood equation for CBZ degradation via UV/TiO<sub>2</sub> system.

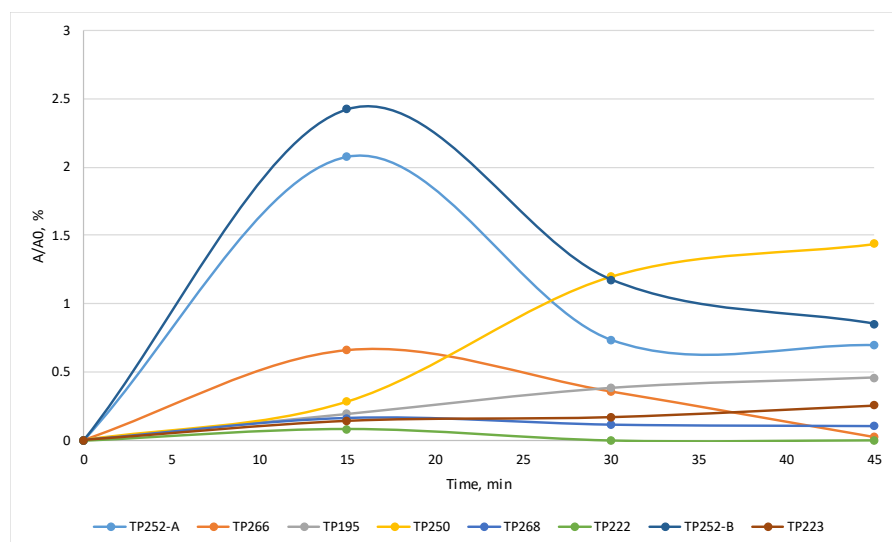

**Figure S3.** Profiles of TPs evolution during CBZ degradation process, A-TP peak area, A0 – CBZ initial peak area.

**Table S1.** CBZ degradation efficiencies vs. photocatalyst dose and irradiation time,  $[CBZ]_0 = 8.75 \text{ mg/L} = 3.71 \times 10^{-5} \text{ M}$ , photocatalyst dose = 100–800 mg/L, irradiation time = 15–45 min.

| 15 min           |                |               | 30 min         |               | 45 min         |               |
|------------------|----------------|---------------|----------------|---------------|----------------|---------------|
| $[TiO_2]$ , mg/L | $[CBZ]$ , mg/L | Efficiency, % | $[CBZ]$ , mg/L | Efficiency, % | $[CBZ]$ , mg/L | Efficiency, % |
| 100              | 1.50           | 82.86         | 0.56           | 93.60         | 0.11           | 98.74         |
| 200              | 1.02           | 88.34         | 0.26           | 97.03         | 0.05           | 99.43         |
| 300              | 0.98           | 88.80         | 0.19           | 97.83         | 0.03           | 99.66         |
| 500              | 0.93           | 89.37         | 0.09           | 98.97         | 0.02           | 99.77         |
| 800              | 0.96           | 89.03         | 0.14           | 98.40         | 0.03           | 99.66         |

### Method S1. CBZ determination method validation

#### 1. Linearity

Stock solution was made in methanol, while the working solutions were performed in water. The MS detector response was tested between 0.01 and 10 mg/L carbamazepine and the method proved to be linear, with  $R^2$  value of 0.9999.

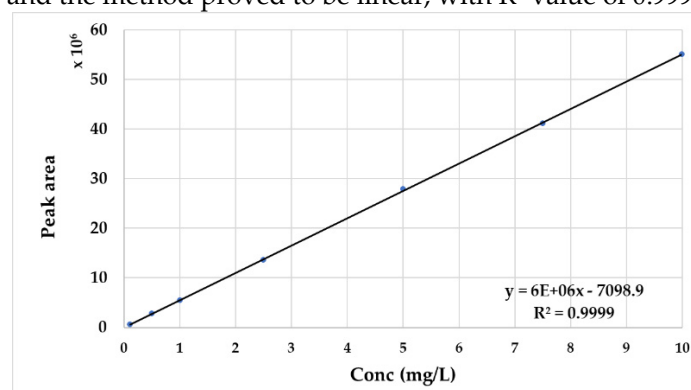

**Method S1. - Figure 1.** MS detector response

#### 2. Sensibility

To test the selectivity of the method, a blank sample was analysed. No interferences have been observed on the retention time of carbamazepine. Thus, the developed method could be considered specific/selective.

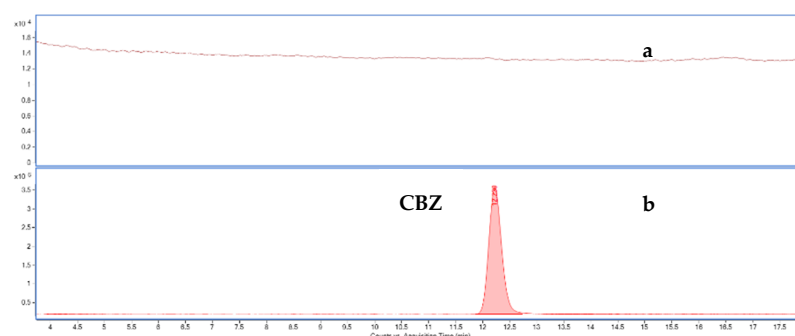

**Method S1. - Figure 2.** SCAN chromatogram of a blank sample that does not contain interferences (a) versus the SCAN chromatogram of a standard solution of 5 mg/L CBZ (b).

### 3. Precision

The accuracy of the method was determined by evaluating the inter-day and intra-day precision. The values were 4.2% and 7.5% for inter-day and intra-day experiments, respectively, which are very good considering the fact that the acceptability limit for an LC-MS method is up to 15%.

### 4. Sensitivity. Detection and quantification limit

Limit of quantification (LOQ) was determined as the lowest point of the calibration curve, such as 0.01 mg/L. The limit of detection was considered to be 2.8 times lower than the LOQ value, such as 0.0036 mg/L.

### 5. Uncertainty measurement

The uncertainty measurement was also calculated, resulting in a value of only 17%, given the fact that no other sample preparation step was involved.

### 6. Analysis measurement

During the samples analysis, all experiments were performed in duplicate. A blank sample and a standard solution were used for each batch of samples. Values lower than LOQ were not involved in the kinetic evaluation.
